# Supplementary material
Source: MDPI journal article supplement (https://www.mdpi.com/2304-6740/4/3/21)
Supplement: s1 [file s1]

# Supplementary Materials: Silylation of Dinitrogen Catalyzed by Hydridodinitrogentris(Triphenylphosphine)Cobalt(I)

Wojciech I. Dzik

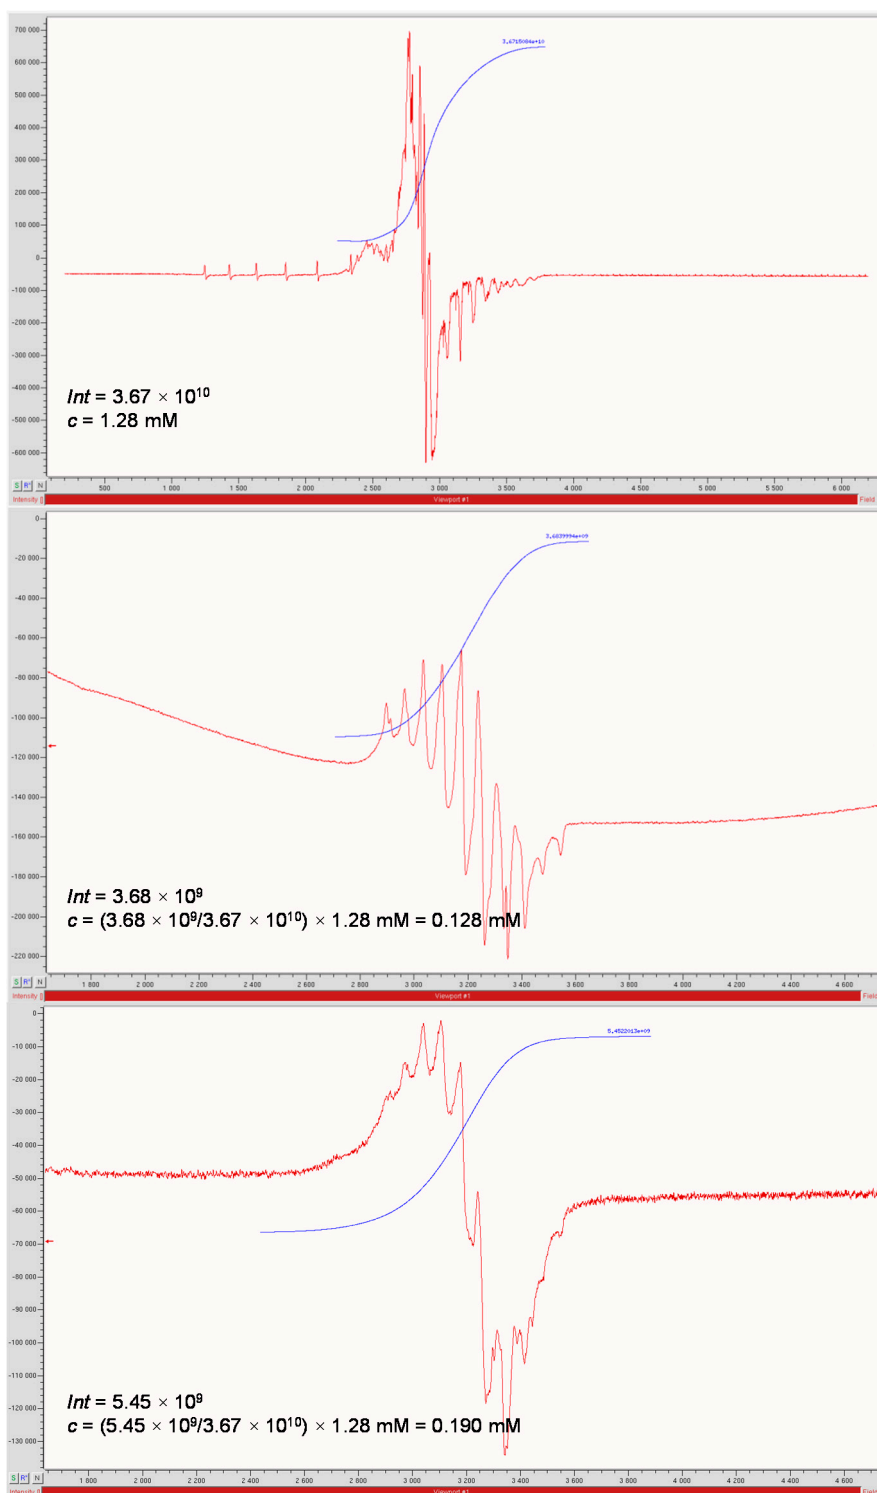

**Figure S1.** Double integrals of the EPR signal of a 1.28 mM THF solution of cobalt(II) meso-tetraphenylporphine (**top**), and of the catalytic reaction mixture measured after 3.5 h (**middle**) and 48 h (**bottom**). Temperature = 20 K, frequency = 9.366 GHz, modulation amplitude: 4 Gauss, attenuation: 20 dB.

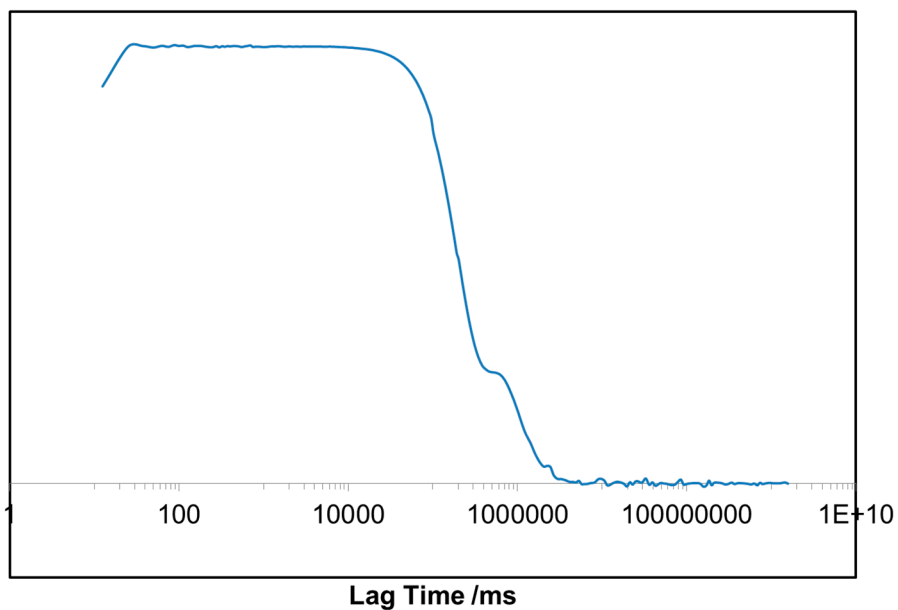

**Figure S2.** DLS normalized intensity correlation function. Parameters: Angle = 15°,  $\lambda$  = 632.8 nm, set viscosity: 0.48 cp (THF).

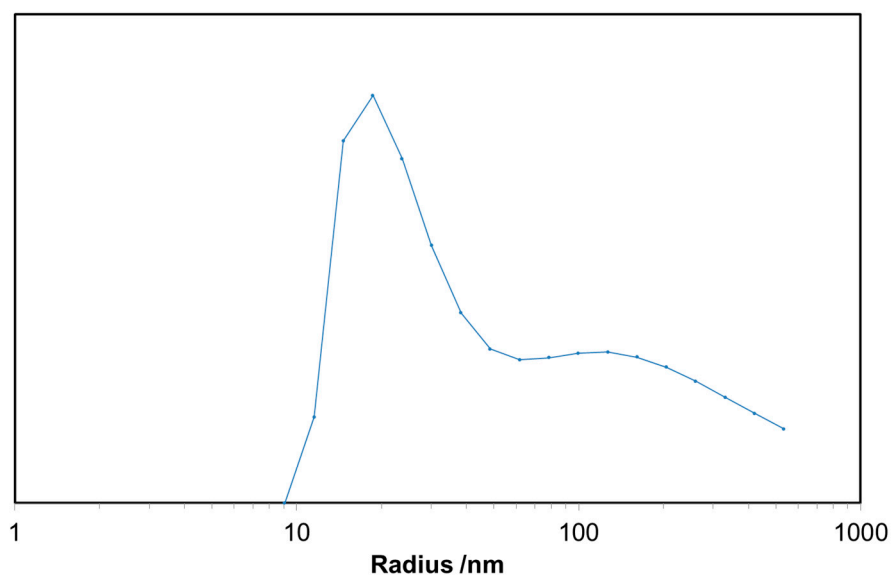

**Figure S3.** Size distribution of nanoparticles measured with DLS.
